# Supplementary material for: Water-resistant HKUST-1 functionalized with polydimethylsiloxane for efficient rubidium ion capture
Source: Royal Society of Chemistry journal article supplement (doi:10.1039/c9nj03632f), 2019-01-01
Supplement: c9nj03632f1.pdf [file c9nj03632f1.pdf]

*Supporting information for*

## **HKUST-1 Water-Resistant Functionalized with Polydimethylsiloxane for Rubidium Ion Efficient Capture**

Ning Tian,<sup>a</sup> Yuan Gao,<sup>a</sup> Jiafei Wu,<sup>a</sup> Suqing Luo,<sup>b</sup> and Wei Dai<sup>\*a</sup>

<sup>a</sup>Key Laboratory of the Ministry of Education for Advanced Catalysis Materials, College of Chemistry and Life Science, Zhejiang Normal University, Jinhua 321004, People's Republic of China

<sup>b</sup>College of Economics and Management, Zhejiang Normal University, Jinhua 321004, People's Republic of China

### **Table S captions:**

**Table S1.** The structural information of MOFs prepared in this work.

**Table S2.** Element composition of SEM-EDS analysis for HKUST-1 and PDMS(2.0)@HKUST-1.

**Table S3.** Comparison of adsorption capability and reusability of Rb<sup>+</sup> on some MOFs materials.

**Table S4.** Adsorption isotherm models used in this study and their linear forms.

**Table S5.** Constants and correlation coefficients of different adsorption models for HKUST-1 before and after coated with PDMS.

**Table S6.** Kinetic calculation equations

**Table S7.** Kinetic parameters for Rb(I) adsorption on HKUST-1 before and after coated with PDMS.

**Table S1.** The structural information of MOFs prepared in this work.

| Samples                | $S_{\text{BET}}$<br>( $\text{m}^2/\text{g}$ ) | $V_{\text{total}}$<br>( $\text{mL}/\text{g}$ ) | $V_{\text{meso}}$<br>( $\text{mL}/\text{g}$ ) | $V_{\text{mic}}$<br>( $\text{mL}/\text{g}$ ) | Average pore<br>diameter (nm) |
|------------------------|-----------------------------------------------|------------------------------------------------|-----------------------------------------------|----------------------------------------------|-------------------------------|
| HKUST-1                | 1242.76                                       | 0.58                                           | 0.10                                          | 0.48                                         | 2.15                          |
| HKUST-1(R1)            | 448.17                                        | 0.22                                           | 0.05                                          | 0.17                                         | 0.95                          |
| HKUST-1(R2)            | 291.20                                        | 0.29                                           | 0.09                                          | 0.20                                         | 0.35                          |
| PDMS(0.5)@ HKUST-1     | 1156.70                                       | 0.51                                           | 0.07                                          | 0.44                                         | 1.82                          |
| PDMS(1.0)@ HKUST-1     | 1103.70                                       | 0.54                                           | 0.15                                          | 0.39                                         | 1.96                          |
| PDMS(2.0)@ HKUST-1     | 1102.64                                       | 0.46                                           | 0.05                                          | 0.41                                         | 1.74                          |
| PDMS(2.0)@ HKUST-1(R1) | 1093.58                                       | 0.42                                           | 0.04                                          | 0.38                                         | 1.69                          |
| PDMS(2.0)@ HKUST-1(R5) | 1082.42                                       | 0.41                                           | 0.04                                          | 0.37                                         | 1.65                          |
| PDMS(3.0)@ HKUST-1     | 1100.90                                       | 0.46                                           | 0.04                                          | 0.42                                         | 1.72                          |

**Table S2.** Element composition of SEM-EDS analysis for HKUST-1 and

PDMS(2.0)@HKUST-1.

| Sample            | Element content, % |       |       |       |       |
|-------------------|--------------------|-------|-------|-------|-------|
|                   | Si                 | Cu    | C     | O     | Total |
| HKUST-1           | 0                  | 13.49 | 55.28 | 31.23 | 100   |
| PDMS(2.0)@HKUST-1 | 1.71               | 7.42  | 57.39 | 33.48 | 100   |

**Table S3** Comparison of adsorption capability and reusability of Rb<sup>+</sup> on some MOFs materials.

| Adsorbent                                     | Adsorption capacities (mg/g) | Reusability (mg/g) | Reference |
|-----------------------------------------------|------------------------------|--------------------|-----------|
| PMA@ HKUST-1                                  | 93                           | 45 (twice)         | (14)      |
| PH@MIL-101(Cr)                                | 89                           | 80 (5 times)       | (13)      |
| MIL-101(Cr)                                   | 73                           | 66 (5 times)       | (13)      |
| MIL-53(Al)                                    | 51                           | 25 (twice)         | (14)      |
| HS-Fe <sub>3</sub> O <sub>4</sub> @MIL-53(Al) | 86                           | 65 (twice)         | (9)       |
| HKUST-1                                       | 82                           | 8 (3 times)        | This work |
| PDMS@HKUST-1                                  | 82                           | 82 (5 times)       | This work |

**Table S4.** Adsorption isotherm models used in this study and their linear forms.

| Isotherm   | Nonlinear form                         | Linear form                                                                        | Plot                             |
|------------|----------------------------------------|------------------------------------------------------------------------------------|----------------------------------|
| Langmuir-I | $q_e = \frac{K_L C_e}{1 + K_L C_e}$    | $\frac{C_e}{q_e} = \frac{1}{q_L \cdot K_L} + \left(\frac{1}{q_L}\right) \cdot C_e$ | $\frac{C_e}{q_e}$ versus $C_e$   |
| Freundlich | $q_e = K_f C_e^{\frac{1}{n}}$          | $\ln q_e = \ln K_f + \left(\frac{1}{n}\right) \cdot \ln C_e$                       | $\ln q_e$ versus $\ln C_e$       |
| Temkin     | $e^{q_e} = (K_T C_e)^{\frac{RT}{b_T}}$ | $q_e = \frac{RT}{b_T} \ln K_T + \frac{RT}{b_T} \ln C_e$                            | $q_e$ versus $\ln C_e$           |
| D-R        | $q_e = q_s e^{(-K_D \varepsilon^2)}$   | $\ln q_e = \ln q_s - K_D \varepsilon^2$                                            | $\ln q_e$ versus $\varepsilon^2$ |

Where  $q_e$  is the maximum capacity of adsorption in mg/g;  $K_L$  is a constant related to the affinity of the binding sites in L/mg; ' $K_f$ ' and ' $n$ ' are the measures of adsorption capacity and intensity of adsorption;  $R$  is the universal gas constant;  $b_T$  is related to the heat of adsorption in kJ/mol.  $T$  is the absolute temperature in K;  $R$  is the universal gas constant;  $K_T$  is the Temkin constant about the capacity of adsorption in L/g;  $q_s$  is the D-R isotherm constant in mg/g;  $K_D$  stands for the constant that is relevant with the adsorption energy in mol<sup>2</sup>/kJ<sup>2</sup>;  $\varepsilon$  represents the Polanyi potential constant in kJ/mol;

**Table S5.** Constants and correlation coefficients of different adsorption models for HKUST-1 before and after coated with PDMS.

| Samples             | Langmuir        |                 |        | Freundlich     |        |        | Temkin            |                |        | D-R             |                                               |        |
|---------------------|-----------------|-----------------|--------|----------------|--------|--------|-------------------|----------------|--------|-----------------|-----------------------------------------------|--------|
|                     | $q_m$<br>(mg/g) | $K_L$<br>(L/mg) | $R^2$  | $K_f$<br>(L/g) | $n$    | $R^2$  | $b_T$<br>(kJ/mol) | $K_T$<br>(L/g) | $R^2$  | $q_s$<br>(mg/g) | $K_D$<br>(mol <sup>2</sup> /kJ <sup>2</sup> ) | $R^2$  |
| HKUST-1             | 83.76           | 0.0052          | 0.2529 | 1.3843         | 1.0305 | 0.9942 | 78.39             | 0.1372         | 0.8631 | 1.46E-05        | 51.05                                         | 0.6560 |
| HKUST-1R1           | 42.24           | 0.0029          | 0.2067 | 0.2896         | 0.8799 | 0.9844 | 146.44            | 0.0986         | 0.9051 | 3.35E-05        | 27.12                                         | 0.8017 |
| HKUST-1R2           | 7.74            | 0.0204          | 0.4997 | 0.2041         | 1.1654 | 0.7047 | 1271.16           | 0.2501         | 0.5468 | 4.29E-05        | 6.03                                          | 0.8892 |
| PDMS(0.5)@HKUST-1   | 83.45           | 0.0045          | 0.2107 | 1.3233         | 1.0063 | 0.9931 | 76.38             | 0.1406         | 0.8804 | 1.46E-05        | 52.68                                         | 0.6686 |
| PDMS(1.0)@HKUST-1   | 83.18           | 0.0017          | 0.2042 | 1.3085         | 1.0021 | 0.9924 | 76.51             | 0.1401         | 0.8759 | 1.47E-05        | 52.67                                         | 0.6687 |
| PDMS(2.0)@HKUST-1   | 82.18           | 0.0054          | 0.35   | 2.3858         | 1.1880 | 0.9901 | 84.67             | 0.1718         | 0.8451 | 1.01E-05        | 52.45                                         | 0.6221 |
| PDMS(3.0)@HKUST-1   | 82.76           | 0.0066          | 0.2522 | 0.8939         | 0.9415 | 0.9909 | 80.43             | 0.1252         | 0.8873 | 2.16E-05        | 50.85                                         | 0.7864 |
| PDMS(2.0)@HKUST-1R1 | 82.11           | 0.0026          | 0.2561 | 1.6525         | 1.0659 | 0.9887 | 78.89             | 0.1491         | 0.8978 | 1.55E-05        | 54.79                                         | 0.7476 |
| PDMS(2.0)@HKUST-1R5 | 51.90           | 0.0021          | 0.2020 | 0.6179         | 0.9562 | 0.9867 | 113.16            | 0.1157         | 0.9374 | 2.55E-05        | 36.76                                         | 0.7713 |

**Table S6.** Kinetic calculation equations.

| Name                           | equations                                                                                    |
|--------------------------------|----------------------------------------------------------------------------------------------|
| Pseudo-first order model       | $\ln(q_e - q_t) = \ln(q_e) - K_1 t$                                                          |
| Pseudo-second order model      | $\frac{t}{q_t} = \frac{1}{K_2 q_e} + \frac{t}{q_e}$                                          |
| Intra-particle diffusion model | $q_t = K_3 t^{1/2}$                                                                          |
| Normalized standard deviation  | $\Delta q(\%) = \frac{(q_{e,\text{exp}} - q_{e,\text{cal}})}{q_{e,\text{exp}}} \times 100\%$ |

Where  $q_e$  and  $q_t$  (mg/g) are the uptakes of thiophene at equilibrium and at time  $t$  (min), respectively,  $K_1$  (1/min) is the adsorption rate constant,  $K_2$  (g/mg.min) is the rate constant for the second-order equation, and  $K_3$  (mg/g.min<sup>1/2</sup>) is the intra-particle diffusion rate constant.

Where  $q_{e,\text{exp}}$  and  $q_{e,\text{cal}}$  are the experimental and calculation uptakes of CR, respectively.

**Table S7.** Kinetic parameters for Rb(I) adsorption on HKUST-1 before and after coated with PDMS.

| Sample              | Pseudo-first-order rate equation |                       |                  |       |                      |                   | Pseudo-second-order rate equation |                     |       |                      |                   | Intra-particle diffusion model |                                     |       |
|---------------------|----------------------------------|-----------------------|------------------|-------|----------------------|-------------------|-----------------------------------|---------------------|-------|----------------------|-------------------|--------------------------------|-------------------------------------|-------|
|                     | $q_{e,exp}$<br>(mg/g)            | $q_{e,cal}$<br>(mg/g) | $K_1$<br>(1/min) | $R^2$ | $\Delta q$<br>(mg/g) | $\Delta q$<br>(%) | $q_{e,cal}$<br>(mg/g)             | $K_2$<br>(g/mg·min) | $R^2$ | $\Delta q$<br>(mg/g) | $\Delta q$<br>(%) | $C$<br>(mg/g)                  | $K_3$<br>(mg/g·min <sup>1/2</sup> ) | $R^2$ |
| HKUST-1             | 83                               | 14.401                | -0.09            | 0.664 | 68.59                | 82.65             | 84.10                             | 0.01                | 0.999 | -1.10                | -1.33             | 64.85                          | 2.49                                | 0.632 |
| HKUST-1R1           | 41                               | 6.615                 | -0.086           | 0.529 | 34.38                | 83.87             | 41.78                             | 0.01                | 0.998 | -0.789               | -1.92             | 27.38                          | 1.87                                | 0.627 |
| HKUST-1R2           | 5                                | 4.499                 | -0.053           | 0.909 | 0.500                | 10.01             | 6.37                              | 0.008               | 0.966 | -1.37                | -27.4             | 0.36                           | 0.59                                | 0.868 |
| PDMS(2.0)@HKUST-1   | 83                               | 18.445                | -0.12            | 0.677 | 64.55                | 77.78             | 84.32                             | 0.01                | 0.999 | -1.32                | -1.59             | 64.03                          | 0.63                                | 0.616 |
| PDMS(2.0)@HKUST-1R1 | 83                               | 16.414                | -0.115           | 0.608 | 66.59                | 80.22             | 84.25                             | 0.01                | 0.999 | -1.246               | -1.50             | 64.73                          | 2.53                                | 0.602 |
| PDMS(2.0)@HKUST-1R5 | 46                               | 8.485                 | -0.06            | 0.928 | 37.52                | 81.55             | 46.38                             | 0.015               | 0.999 | -0.38                | -0.83             | 35.50                          | 1.41                                | 0.599 |

**Figure S captions:**

**Fig. S1** Weber–Morris intra-particle diffusion plots for the adsorption of Rb(I) on HKUST-1 and PDMS(2.0)@HKUST-1 before and after recycle use.

**Fig. S2** Effect of pH on the zeta potential of HKUST-1.

**Fig. S3** Effect of pH on the Rb(I) uptake capacity of HKUST-1.



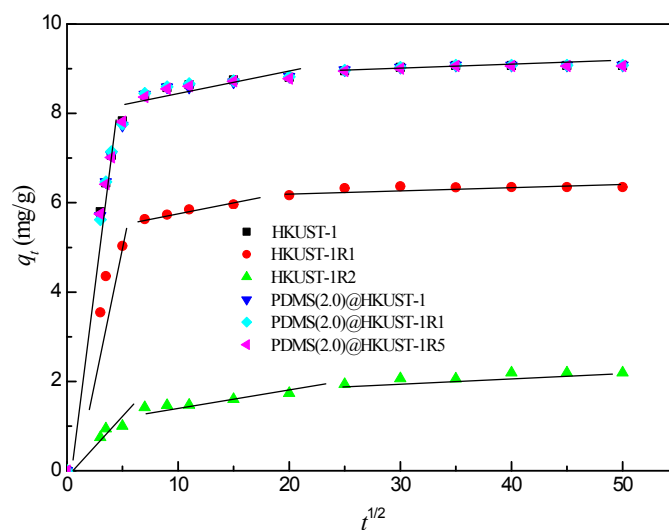

**Fig. S1.** Weber–Morris intra-particle diffusion plots for the adsorption of Rb(I) on HKUST-1 and PDMS(2.0)@HKUST-1 before and after recycle use.

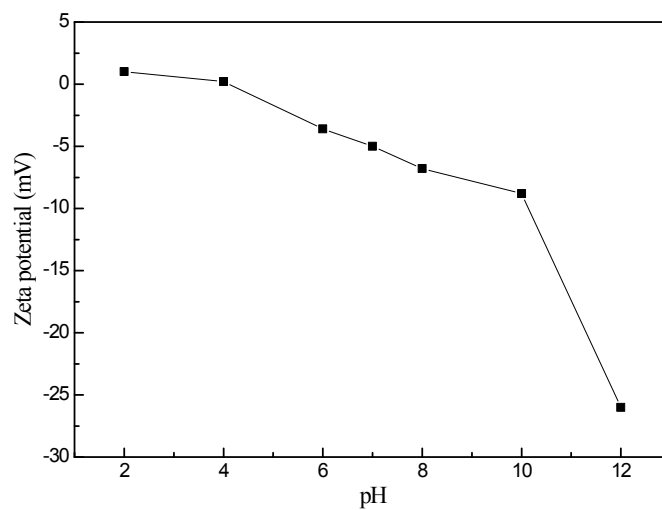

**Fig. S2.** Effect of pH on the zeta potential of HKUST-1.

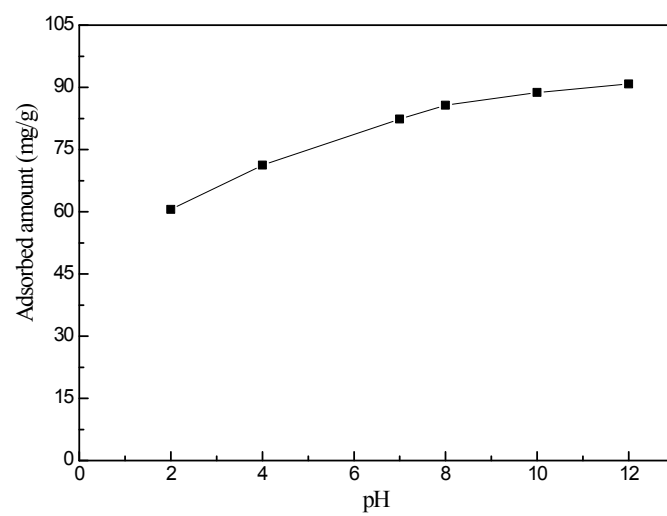

**Fig. S3.** Effect of pH on the Rb(I) uptake capacity of HKUST-1.
